# Supplementary material
Source: Research Square preprint supplement (doi:10.21203/rs.3.rs-9561084/v1)
Supplement: Supplementary file 1 [file 6b5835adfb59f331680da43b.docx]

**Supplementary Results**

**Table S1. Life expectancy and years of life loss of kidney transplant recipient and matched general population**

|  | Kidney transplant recipients | Matched general population |  |
| --- | --- | --- | --- |
| Strata | **LE (95%CI)** | **LE (95%CI)** | **Years of life loss (95%CI)** |
| Overall | 23.09 (21.91, 25.01) | 36.33 (35.95, 36.51) | 13.24 (11.15, 14.31) |
| Sex |  |  |  |
| Male | 22.40 (20.61, 24.20) | 33.30 (32.93, 33.52) | 10.91 (9.05, 12.54) |
| Female | 24.23 (22.26, 26.35) | 39.93 (39.49, 40.25) | 15.70 (13.47, 17.70) |
| Age group |  |  |  |
| 20-39 yrs | 35.42 (30.09, 41.92) | 49.34 (49.10, 49.63) | 13.92 (7.55, 19.31) |
| 40-59 yrs | 20.17 (19.19, 21.91) | 33.56 (33.38, 33.72) | 13.40 (11.58, 14.29) |
| 60+ | 11.81 (11.05, 12.84) | 20.66 (20.49, 20.93) | 8.85 (7.99, 9.70) |
| Diabetes |  |  |  |
| With | 16.36 (15.21, 18.49) | 32.20 (31.68, 32.62) | 15.84 (13.71, 16.89) |
| Without | 25.70 (24.06, 28.25) | 37.79 (37.54, 38.09) | 12.09 (9.62, 13.77) |
| Cardiovascular Disease |  |  |  |
| With | 19.50 (18.23, 23.03) | 32.79 (32.26, 33.25) | 13.29 (9.90, 14.62) |
| Without | 24.18 (23.08, 26.29) | 37.67 (37.29, 37.97) | 13.50 (11.45, 14.52) |

LE: life expectancy (unit: year)

Years of life loss: the difference in life expectancy between kidney transplant recipients and matched general population.

**Table S2. Short-term survival rate of kidney transplant recipient and matched dialysis patient cohorts (1:10 matching ratio)**

|  |  | Kidney transplant recipients | | Matched dialysis patients | |
| --- | --- | --- | --- | --- | --- |
| Overall |  | **Survival rate** | **95% CI** | **Survival rate** | **95% CI** |
|  | 1-year | 0.9683 | (0.9640, 0.9727) | 0.9453 | (0.9439, 0.9472) |
|  | 5-year | 0.8978 | (0.8901, 0.9053) | 0.7437 | (0.7397, 0.7463) |
|  | 10-year | 0.7824 | (0.7714, 0.7940) | 0.5363 | (0.5328, 0.5400) |
| Sex |  |  |  |  |  |
| Male | 1-year | 0.9649 | (0.9592, 0.9715) | 0.9330 | (0.9307, 0.9361) |
|  | 5-year | 0.8929 | (0.8843, 0.9022) | 0.7014 | (0.6967, 0.7066) |
|  | 10-year | 0.7639 | (0.7509, 0.7780) | 0.4791 | (0.4729, 0.4848) |
| Female | 1-year | 0.9727 | (0.9676, 0.9772) | 0.9577 | (0.9553, 0.9599) |
|  | 5-year | 0.9047 | (0.8964, 0.9164) | 0.7909 | (0.7854, 0.7948) |
|  | 10-year | 0.8060 | (0.7943, 0.8191) | 0.6076 | (0.6003, 0.6126) |
| Age group |  |  |  |  |  |
| Age 20-39 | 1-year | 0.9822 | (0.9748, 0.9870) | 0.9723 | (0.9697, 0.9747) |
|  | 5-year | 0.9493 | (0.9388, 0.9586) | 0.8648 | (0.8593, 0.8699) |
|  | 10-year | 0.8997 | (0.8871, 0.9128) | 0.7317 | (0.7249, 0.7394) |
| Age 40-59 | 1-year | 0.9684 | (0.9617, 0.9738) | 0.9466 | (0.9446, 0.9487) |
|  | 5-year | 0.8997 | (0.8913, 0.9081) | 0.7381 | (0.7337, 0.7433) |
|  | 10-year | 0.7712 | (0.7577, 0.7859) | 0.5172 | (0.5124, 0.5218) |
| Age 60+ | 1-year | 0.9396 | (0.9221, 0.9534) | 0.8977 | (0.8915, 0.9053) |
|  | 5-year | 0.7792 | (0.7487, 0.8047) | 0.5327 | (0.5221, 0.5432) |
|  | 10-year | 0.5675 | (0.5259, 0.6070) | 0.2377 | (0.2276, 0.2483) |
| Diabetes |  |  |  |  |  |
| With | 1-year | 0.9547 | (0.9429, 0.9629) | 0.9078 | (0.9020, 0.9117) |
|  | 5-year | 0.8640 | (0.8458, 0.8782) | 0.5894 | (0.5836, 0.5975) |
|  | 10-year | 0.6962 | (0.6790, 0.7181) | 0.3136 | (0.3064, 0.3213) |
| Without | 1-year | 0.9736 | (0.9687, 0.9768) | 0.9630 | (0.9615, 0.9647) |
|  | 5-year | 0.9112 | (0.9032, 0.9187) | 0.8189 | (0.8156, 0.8225) |
|  | 10-year | 0.8141 | (0.8025, 0.8236) | 0.6503 | (0.6457, 0.6538) |
| Cardiovascular Disease | |  |  |  |  |
| With | 1-year | 0.9559 | (0.9439, 0.9651) | 0.9135 | (0.9088, 0.9180) |
|  | 5-year | 0.8630 | (0.8468, 0.8754) | 0.6382 | (0.6308, 0.6450) |
|  | 10-year | 0.7104 | (0.6899, 0.7274) | 0.3918 | (0.3842, 0.4004) |
| Without | 1-year | 0.9739 | (0.9684, 0.9777) | 0.9610 | (0.9593, 0.9629) |
|  | 5-year | 0.9136 | (0.9040, 0.9212) | 0.7982 | (0.7943, 0.8016) |
|  | 10-year | 0.8130 | (0.8024, 0.8242) | 0.6060 | (0.6013, 0.6103) |

**Table S3. Life expectancy and years of life gained** **of kidney transplant recipient and matched dialysis patient cohorts (1:5 matching ratio)**

|  | Kidney transplant recipients | Matched dialysis patients |  |
| --- | --- | --- | --- |
| Strata | **LE (95%CI)** | **LE (95%CI)** | **Years of life gained (95%CI)** |
| Overall | 23.22 (22.00, 25.00) | 14.29 (14.04, 14.63) | 8.92 (7.62, 10.75) |
| Sex |  |  |  |
| Male | 22.29 (20.8, 24.44) | 12.84 (12.51, 13.16) | 9.45 (7.85, 11.95) |
| Female | 24.34 (22.36, 26.85) | 16.14 (15.65, 16.59) | 8.20 (6.22, 10.69) |
| Age group |  |  |  |
| 20-39 yrs | 34.92 (30.50, 41.23) | 21.66 (20.88, 23.75) | 13.26 (8.01, 19.35) |
| 40-59 yrs | 20.20 (19.37, 21.50) | 12.93 (12.63, 13.22) | 7.27 (6.38, 8.53) |
| 60+ | 11.81 (11.05, 12.81) | 6.81 (6.63, 7.04) | 5.00 (4.22, 5.99) |
| Diabetes |  |  |  |
| With | 16.37 (15.41, 18.21) | 8.94 (8.67, 9.34) | 7.43 (6.46, 9.46) |
| Without | 25.71 (23.96, 27.83) | 16.79 (16.50, 17.35) | 8.93 (6.92, 10.90) |
| Cardiovascular Disease |  |  |  |
| With | 19.51 (17.75, 22.77) | 10.58 (10.31, 10.95) | 8.93 (7.04, 12.16) |
| Without | 24.16 (22.86, 26.60) | 16.57 (16.22, 17.05) | 7.59 (6.04, 10.11) |

LE: life expectancy (unit: year)
